# Supplementary material for: Fluorine patterning of graphene: effects of fluorine content and temperature
Source: Royal Society of Chemistry journal article supplement (doi:10.1039/d0nr06325h), 2020-12-10
Supplement: d0nr06325h1.pdf [file d0nr06325h1.pdf]

## Supplementary Materials: Fluorine patterning of graphene: Effects of fluorine content and temperature

Ruslan D. Yamaletdinov<sup>\*,1,2</sup>, Yaroslav A. Nikiforov<sup>3</sup>,  
Lyubov G. Bulusheva<sup>2</sup>, Alexander V. Okotrub<sup>2</sup>

<sup>1</sup> Boreskov Institute of Catalysis SB RAS, 5, Lavrentiev Ave., 630090 Novosibirsk, Russia

<sup>2</sup> Nikolaev Institute of Inorganic Chemistry SB RAS, 3, Lavrentiev Ave., 630090, Novosibirsk,  
Russia

<sup>3</sup> Novosibirsk State University, 1, Pirogova str., 630090, Novosibirsk, Russia

\* *yamaletdinov@niic.nsc.ru*

## Structures of $\text{CF}_{0.5}$

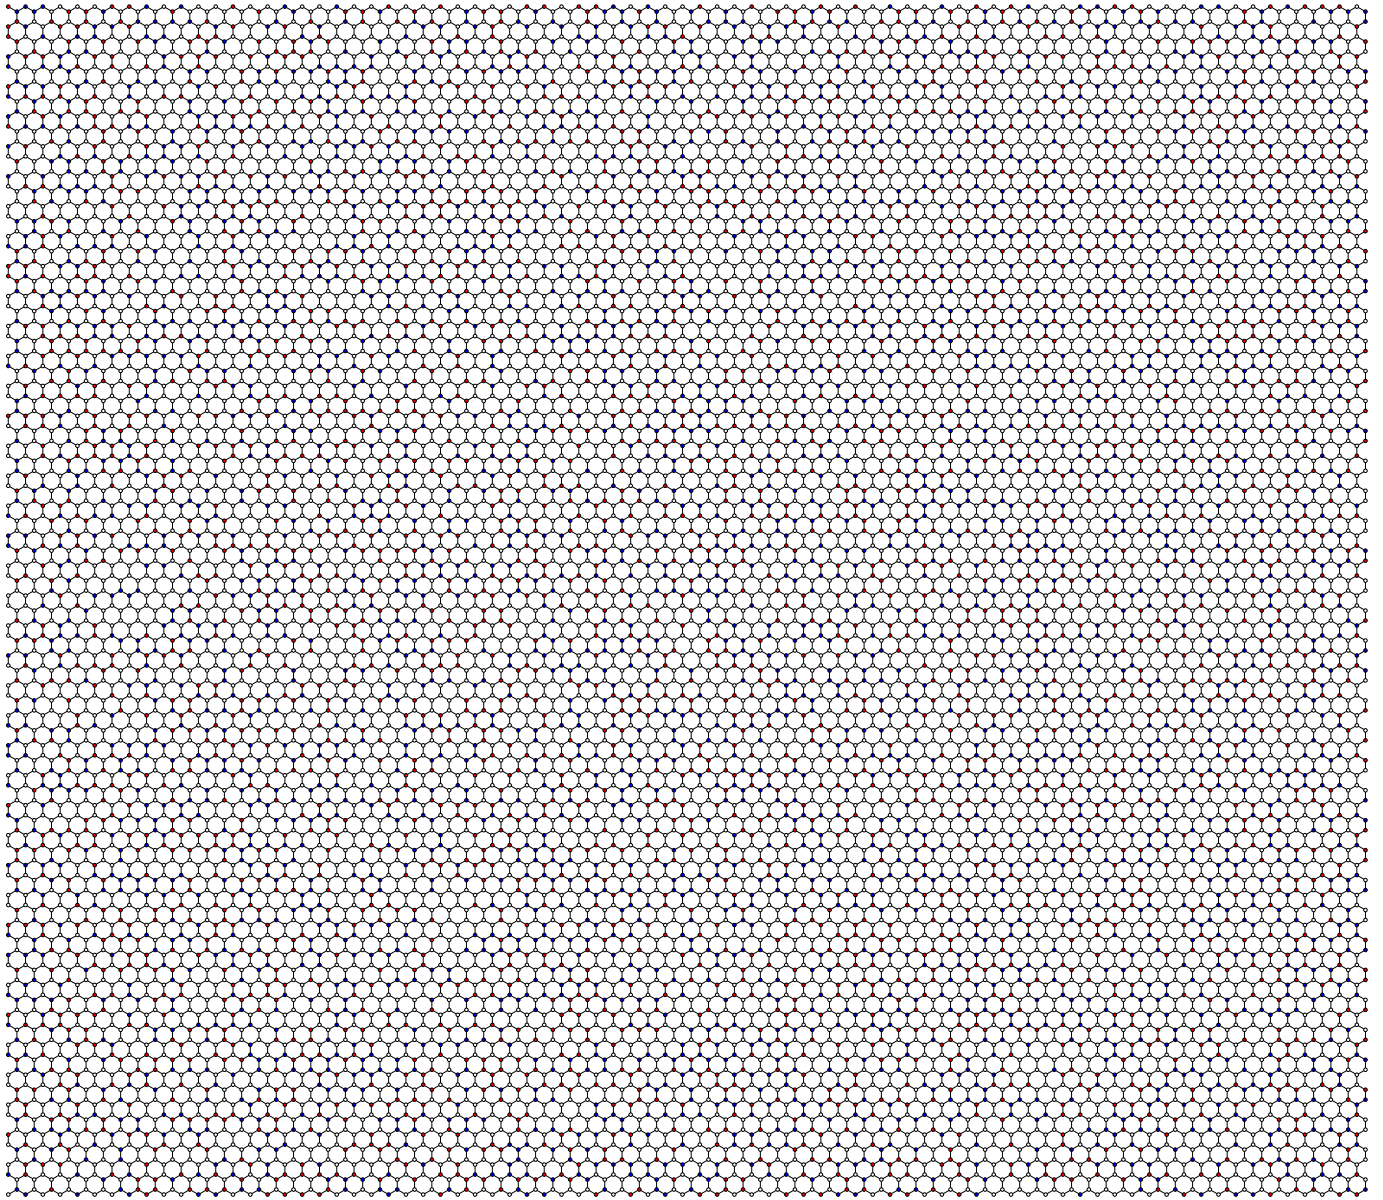

Figure S.1:  $\text{C}_{12640}\text{F}_{6320}$ , generated at  $\beta = 0 \text{ eV}^{-1}$ . Red and blue colors represent top and bottom fluorinated carbon atoms.

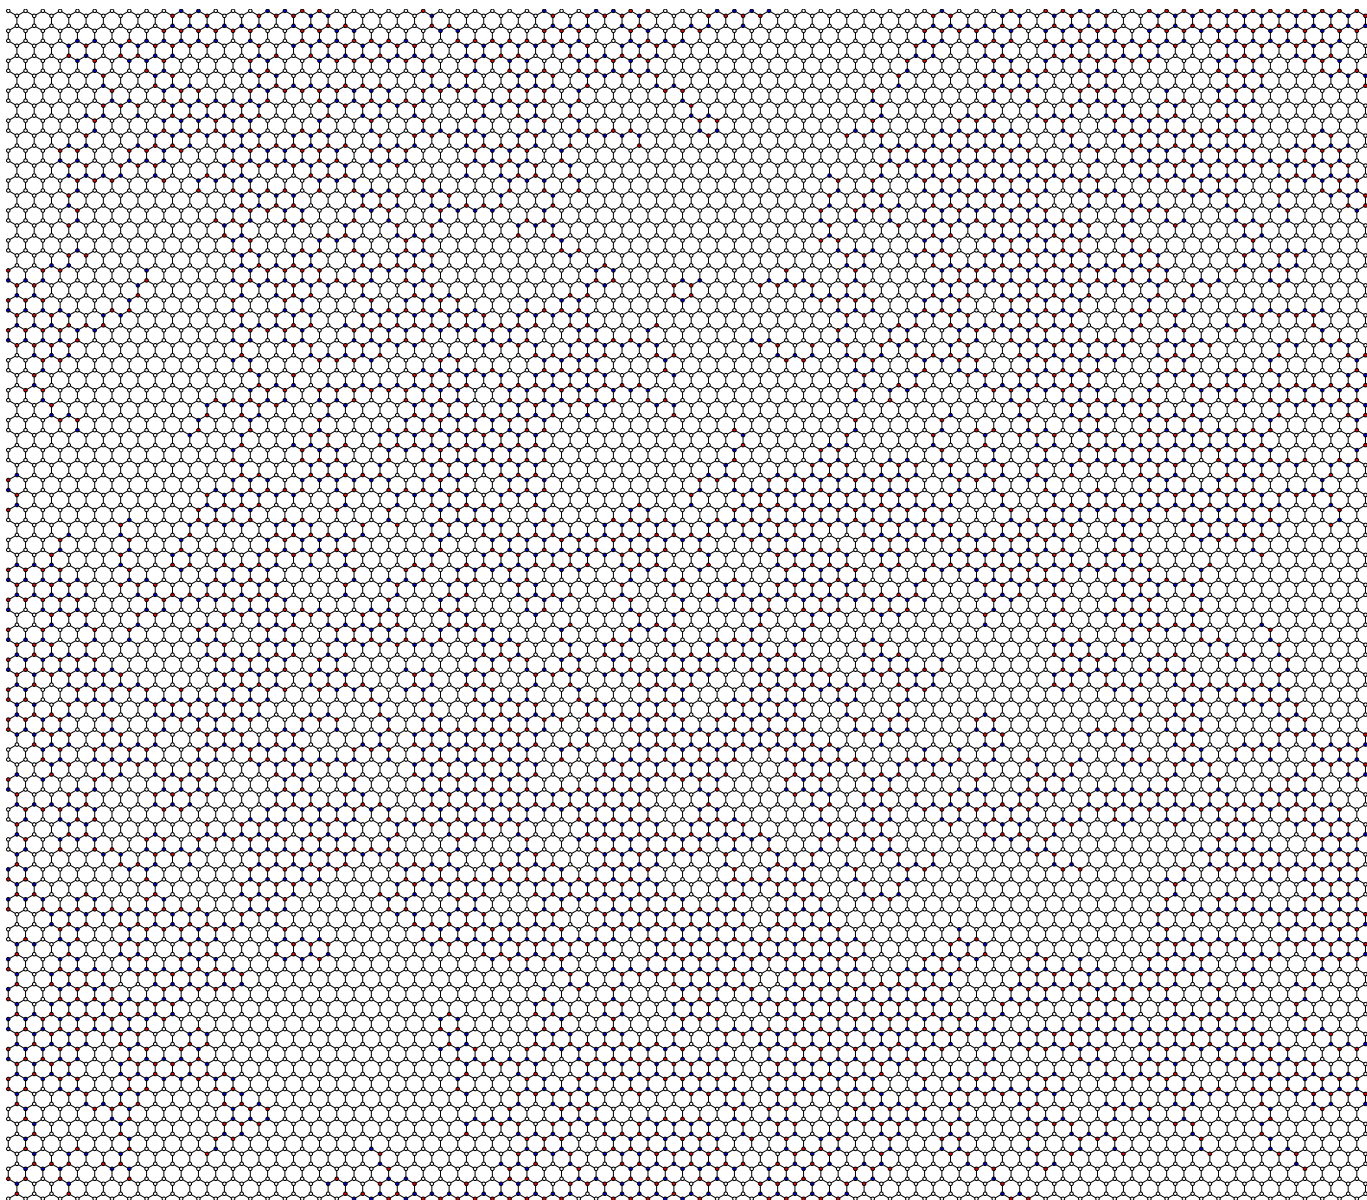

Figure S.2:  $C_{12640}F_{6320}$ , generated at  $\beta = 10 \text{ eV}^{-1}$ . Red and blue colors represent top and bottom fluorinated carbon atoms.

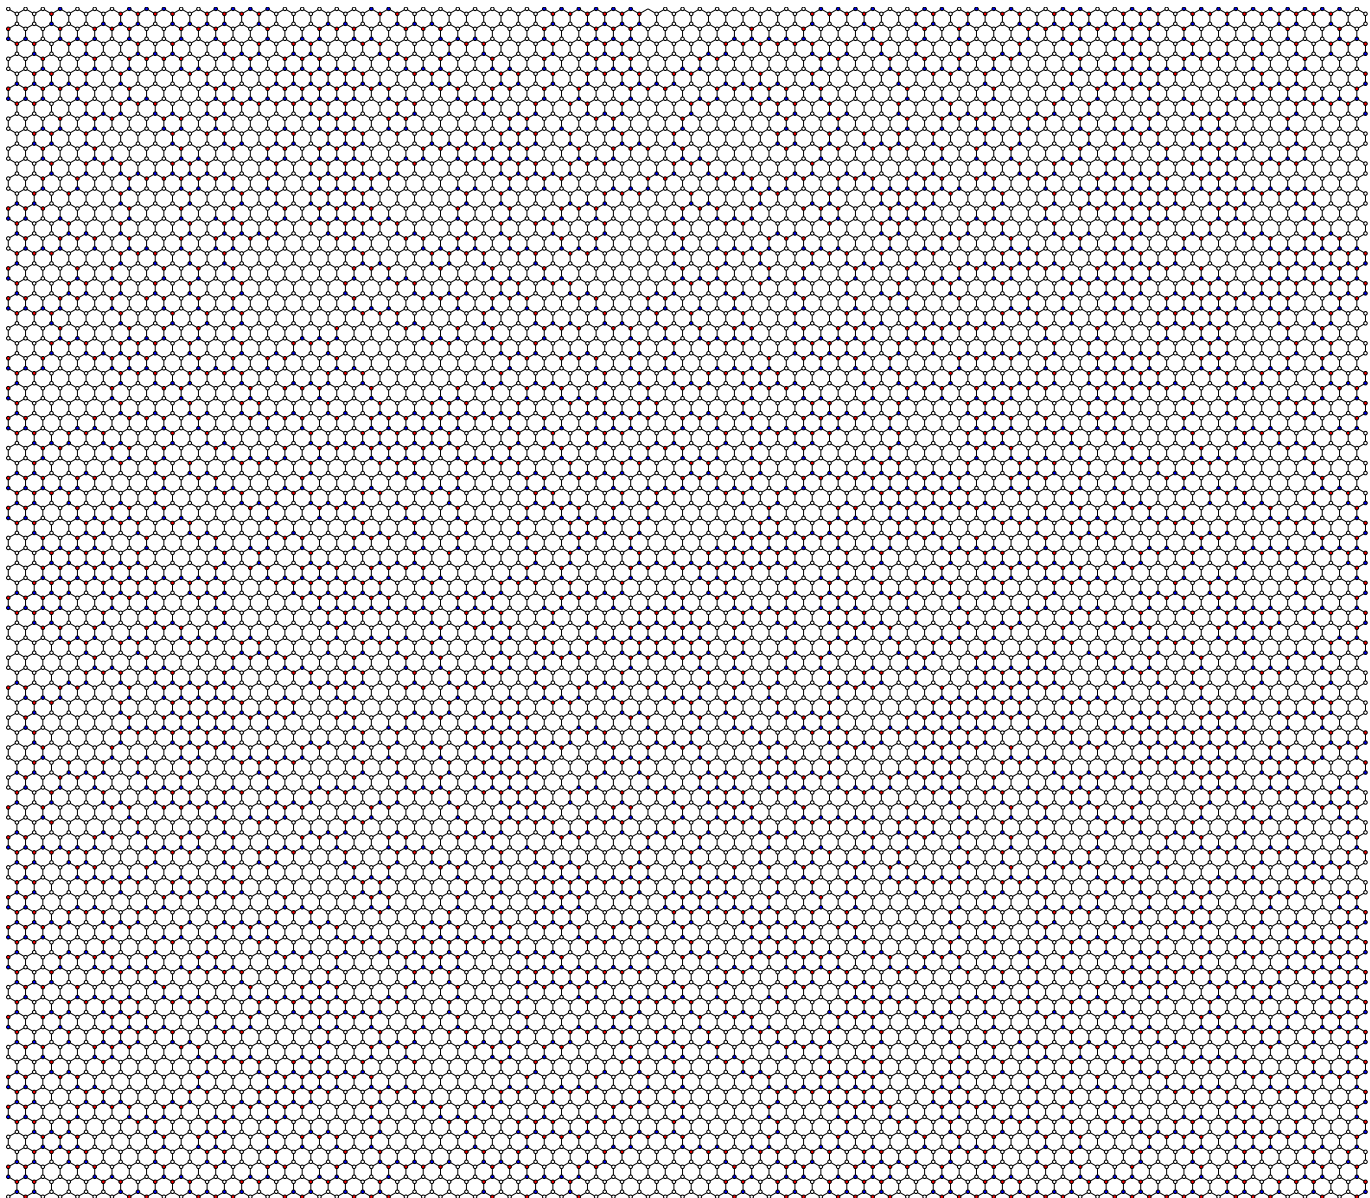

Figure S.3:  $C_{12640}F_{6320}$ , generated at  $\beta = 30 \text{ eV}^{-1}$ . Red and blue colors represent top and bottom fluorinated carbon atoms.
